# Supplementary material for: Association between Posttreatment Serum Platelet-to-Lymphocyte Ratio and Distant Metastases in Patients with Hepatocellular Carcinoma Receiving Curative Radiation Therapy
Source: MDPI journal article supplement (doi:10.3390/cancers15071978), 2023-03-26
Supplement: s1 [file s1]

Supplementary Table S1. Distribution of serum indices according to distant metastasis.

| Serum indices | Pre                |                    |          | Post: High    |                     |                      | Post: Low     |                    |                   |
|---------------|--------------------|--------------------|----------|---------------|---------------------|----------------------|---------------|--------------------|-------------------|
|               | DM (-) (n=47)      | DM (+) (n=29)      | <i>P</i> | DM (-) (n=47) | DM (+) (n=29)       | <i>p</i>             | DM (-) (n=47) | DM (+) (n=29)      | <i>p</i>          |
| SII           |                    |                    | 0.724    | SII-H         |                     | 0.295                | SII-L         |                    | 0.454             |
| Mean±SD       | 374.5±381.3        | 373.1±291.7        |          | Mean±SD       | 1162.7±1563.2       | 1395.2±1410.0        | Mean±SD       | 184.9±169.8        | 229.1±230.1       |
| median(IQR)   | 249.9(151.3-458.5) | 306.9(129.2-527.6) |          | median(IQR)   | 598.4(406.7-1281.4) | 1024.7(406.8-1925.2) | median(IQR)   | 156.8(104.8-207.8) | 187.5(92.3-301.5) |
| NL            |                    |                    | 0.889    | NL-H          |                     | 0.146                | NL-L          |                    | 0.067             |
| Mean±SD       | 2.8±1.9            | 2.4±1.0            |          | Mean±SD       | 17.0±38.6           | 11.3±5.6             | Mean±SD       | 4.0±12.8           | 2.4±0.9           |
| median(IQR)   | 2.2(1.4-3.4)       | 2.2(1.6-2.7)       |          | median(IQR)   | 7.4(5.0-12.7)       | 9.8(6.4-14.7)        | median(IQR)   | 1.7(1.5-2.6)       | 2.4(1.8-2.8)      |
| PL            |                    |                    | 0.94     | PL-H          |                     | 0.012                | PL-L          |                    | 0.104             |
| Mean±SD       | 121.7±79.0         | 114.6±49.7         |          | Mean±SD       | 298.5±391.6         | 354.8±235.9          | Mean±SD       | 86.1±32.7          | 98.1±41.8         |
| median(IQR)   | 101.3(69.0-151.3)  | 104.4(78.6-148.7)  |          | median(IQR)   | 217.3(157.4-291.1)  | 285.0(235.8-398.7)   | median(IQR)   | 81.2(65.5-100.8)   | 95.7(78.8-109.7)  |
| PNI           |                    |                    | 0.05     | PNI-H         |                     | 0.074                | PNI-L         |                    | 0.248             |
| Mean±SD       | 39.5±8.7           | 43.4±6.4           |          | Mean±SD       | 39.6±5.8            | 41.9±4.9             | Mean±SD       | 30.9±7.0           | 32.2±4.8          |
| median(IQR)   | 40.2(34.1-46.5)    | 42.5(39.7-48.4)    |          | median(IQR)   | 39.5(34.4-44.7)     | 41.9(39.2-46.0)      | median(IQR)   | 29.1(25.4-35.8)    | 34.1(29.0-36.0)   |
| ALC           |                    |                    | 0.494    |               |                     |                      | ALC-L         |                    | 0.081             |
| Mean±SD       | 1.2±0.6            | 1.4±0.7            |          |               |                     |                      | Mean±SD       | 0.5±0.3            | 0.4±0.2           |
| median(IQR)   | 1.0(0.8-1.6)       | 1.2(0.7-2.0)       |          |               |                     |                      | median(IQR)   | 0.4(0.3-0.6)       | 0.3(0.2-0.4)      |
| LM            |                    |                    | 0.494    | LM-H          |                     | 0.748                | LM-L          |                    | 0.072             |
| Mean±SD       | 2.7±1.1            | 2.9±1.1            |          | Mean±SD       | 2.8±1.0             | 3.5±3.3              | Mean±SD       | 0.9±0.5            | 0.7±0.3           |
| median(IQR)   | 2.7(2.0-3.4)       | 3.1(1.9-3.6)       |          | median(IQR)   | 2.7(2.2-3.2)        | 2.5(2.2-3.5)         | median(IQR)   | 0.9(0.5-1.1)       | 0.6(0.4-0.9)      |
| A             |                    |                    | 0.048    | A-H           |                     | 0.055                | A-L           |                    | 0.072             |

|             |                 |                 |       |             |                 |                 |       |             |                 |                 |
|-------------|-----------------|-----------------|-------|-------------|-----------------|-----------------|-------|-------------|-----------------|-----------------|
| Mean±SD     | 34.3±5.5        | 36.8±4.4        |       | Mean±SD     | 35.8±5.0        | 38.1±4.3        |       | Mean±SD     | 27.3±6.4        | 29.6±4.5        |
| median(IQR) | 34.0(30.0-39.0) | 37.0(35.0-40.0) |       | median(IQR) | 34.0(32.0-41.0) | 39.0(35.0-41.0) |       | median(IQR) | 26.0(22.0-33.0) | 31.0(27.0-33.0) |
| AA          |                 |                 | 0.773 | AA-H        |                 |                 | 0.423 | AA-L        |                 | 0.724           |
| Mean±SD     | 0.1±0.0         | 0.1±0.1         |       | Mean±SD     | 1.6±9.9         | 0.1±0.1         |       | Mean±SD     | 1.1±6.7         | 0.1±0.0         |
| median(IQR) | 0.1(0.1-0.1)    | 0.1(0.1-0.2)    |       | median(IQR) | 0.1(0.1-0.2)    | 0.1(0.1-0.2)    |       | median(IQR) | 0.1(0.0-0.1)    | 0.1(0.0-0.1)    |
| P           |                 |                 | 0.626 | P-H         |                 |                 | 0.548 | P-L         |                 | 0.898           |
| Mean±SD     | 71.8±5.5        | 70.6±13.5       |       | Mean±SD     | 73.6±4.7        | 72.8±13.5       |       | Mean±SD     | 59.9±8.1        | 59.4±12.1       |
| median(IQR) | 71.0(69.0-76.0) | 73.0(69.0-75.0) |       | median(IQR) | 74.0(72.0-77.0) | 74.0(70.0-78.0) |       | median(IQR) | 62.0(53.0-66.0) | 61.0(57.0-65.0) |
| H           |                 |                 | 0.352 | H-H         |                 |                 | 0.037 | H-L         |                 | 0.273           |
| Mean±SD     | 12.6±1.8        | 12.8±1.8        |       | Mean±SD     | 13.1±1.8        | 13.9±1.7        |       | Mean±SD     | 10.6±2.1        | 10.9±2.0        |
| median(IQR) | 12.4(11.4-13.9) | 12.9(11.5-14.1) |       | median(IQR) | 13.1(11.5-14.5) | 14.1(12.7-14.8) |       | median(IQR) | 10.0(9.3-12.0)  | 11.3(9.9-12.3)  |

DM, distant metastasis; SII, systemic inflammation index; NLR, neutrophil-to-lymphocyte ratio; PLR, platelet-to-lymphocyte ratio; PNI, prognostic nutritional index; ALC, absolute lymphocyte count; LMR, lymphocyte-to-monocyte ratio; A, albumin; AAR, albumin-to-alkaline phosphatase ratio; P, total protein; H, hemoglobin; SII-H, highest systemic inflammation index; SII-L, lowest systemic inflammation index; NLR-H, highest neutrophil-to-lymphocyte ratio; NLR-L, lowest neutrophil-to-lymphocyte ratio; PLR-H, highest platelet-to-lymphocyte ratio; PLR-L, lowest platelet-to-lymphocyte ratio; PNI-H, highest prognostic nutritional index; PNI-L, lowest prognostic nutritional index; ALC-L, lowest absolute lymphocyte count; LMR-H, highest lymphocyte-to-monocyte ratio; LMR-L, lowest lymphocyte-to-monocyte ratio; A-H, highest albumin; A-L, lowest albumin; AAR-H, highest albumin-to-alkaline phosphatase ratio; AAR-L, lowest albumin-to-alkaline phosphatase ratio; P-H, highest total protein; P-L, lowest total protein; H-H, highest hemoglobin; H-L, lowest hemoglobin.

\**P* values were calculated using the Wilcoxon rank sum test
